# Supplementary material
Source: publisher site journal article supplement (https://www.dovepress.com/article/420828)
Supplement: Supplementary file 1 [file get_supplementary_file.php]

**Supplementary materials**

**Supplementary Fig 1.** The optimal cut-off value of RM width determined by X-tile software (A, overall survival; B, disease-free survival)


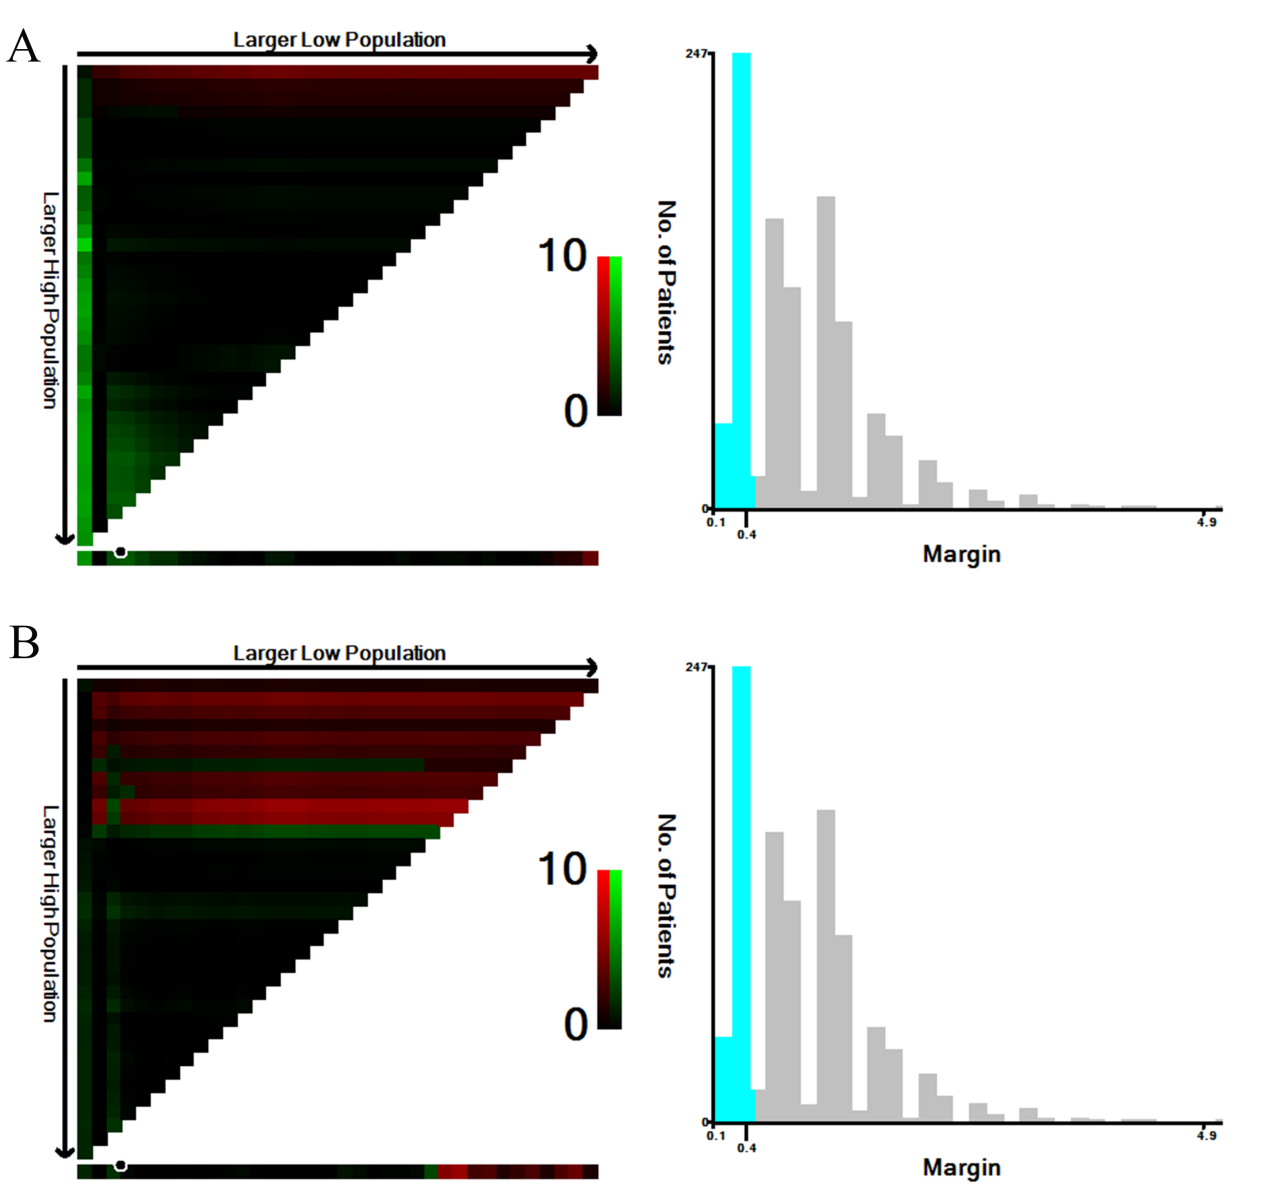


| **Supplementary Table 1.** Tests of Schoenfeld’s residuals | | | | |
| --- | --- | --- | --- | --- |
| **Characteristics** | **Overall survival**  ***P-*value** | | **Disease-free survival *P-*value** | |
|  | **Before PSM** | **After PSM** | **Before PSM** | **After PSM** |
| **Age** | 0.934 | 0.220 | 0.066 | 0.089 |
| **Gender** | 0.108 | 0.200 | 0.134 | 0.068 |
| **HBV infection** | 0.828 | 0.270 | 0.511 | 0.991 |
| **White blood cell** | 0.119 | 0.740 | 0.318 | 0.870 |
| **Hemoglobin** | 0.807 | 0.500 | 0.096 | 0.074 |
| **Platelet** | 0.948 | 0.710 | 0.740 | 0.524 |
| **ALBI grade** | 0.920 | 0.680 | 0.421 | 0.240 |
| **AFP** | 0.343 | 0.450 | 0.054 | 0.072 |
| **GGT** | 0.393 | 0.740 | 0.480 | 0.710 |
| **ALP** | 0.067 | 0.180 | 0.841 | 0.895 |
| **RM** | 0.566 | 0.730 | 0.143 | 0.426 |
| **Hospital stays** | 0.537 | 0.520 | 0.583 | 0.876 |
| **Tumor diameter** | 0.794 | 0.350 | 0.061 | 0.075 |
| **Cirrhosis** | 0.515 | 0.190 | 0.860 | 0.715 |
| **ES grade** | 0.419 | 0.190 | 0.261 | 0.296 |
| **Satellite** | 0.091 | 0.120 | 0.512 | 0.649 |
| **Capsule** | 0.725 | 0.490 | 0.348 | 0.570 |
| **MVI** | 0.896 | 0.420 | 0.821 | 0.945 |
| **Adjuvant TACE** | 0.476 | 0.400 | 0.799 | 0.712 |
| **Global** | 0.487 | 0.670 | 0.274 | 0.266 |
